# Supplementary material
Source: PubMed Central journal article supplement (PMC3536122)
Supplement: IAI.01092-12_zii999099958so1.pdf [file IAI.01092-12_zii999099958so1.pdf]

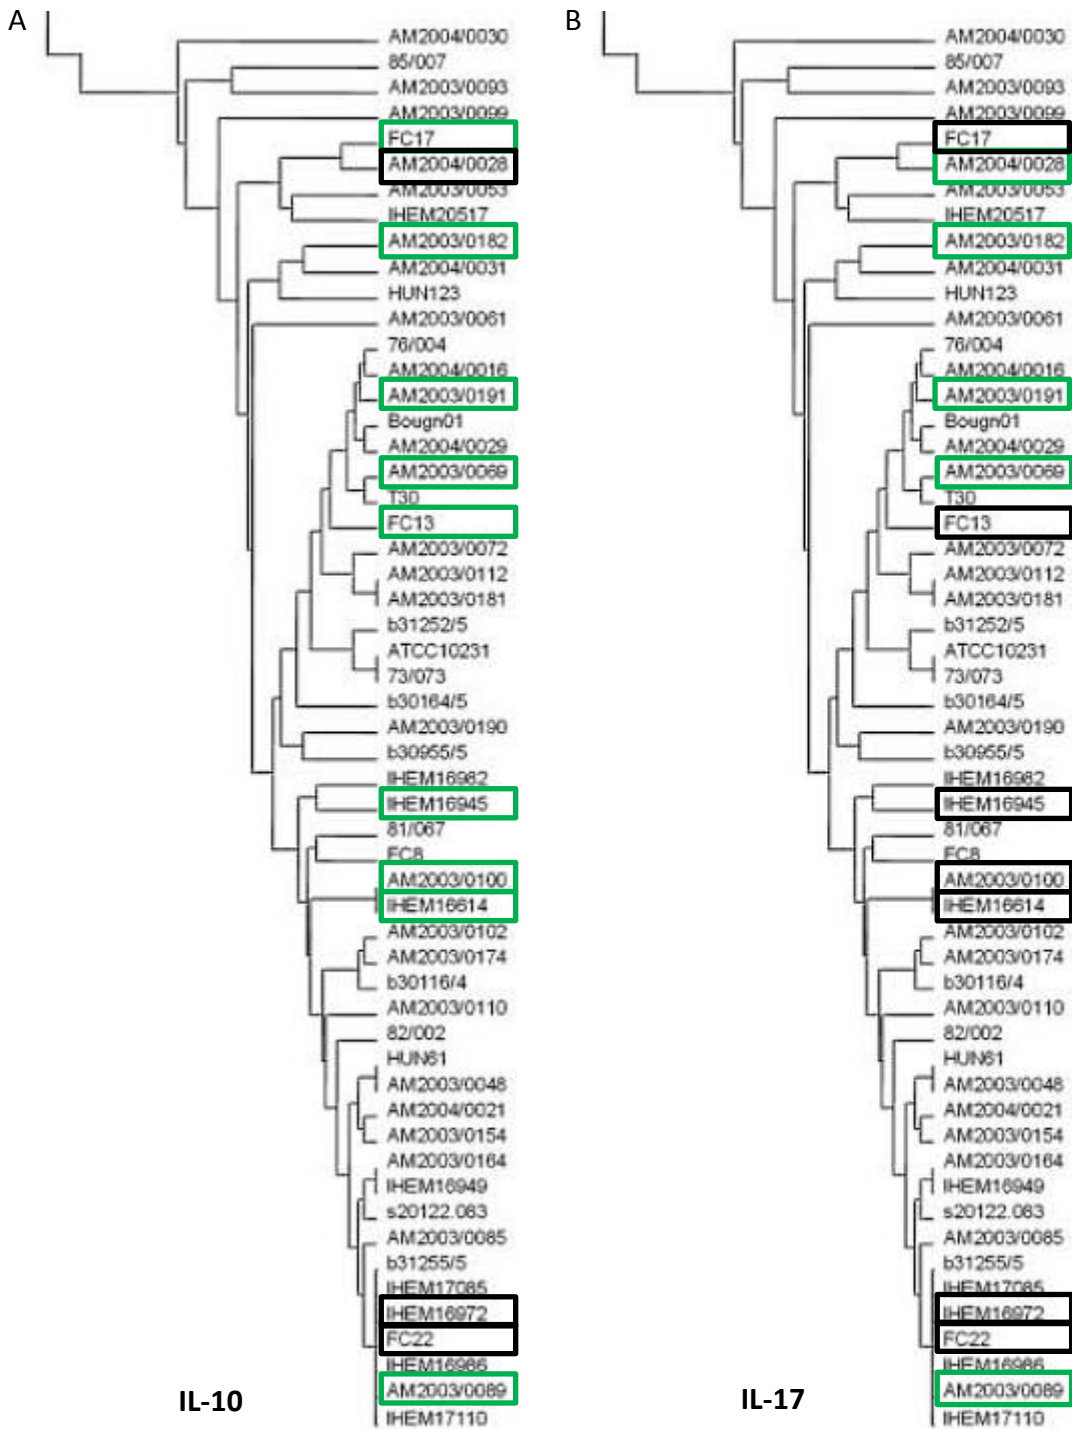

**FIG S1** Positions of the analysed clade 2 strains in a phylogenetic tree constructed based on MLST data (7). Boxes reflect the differences in PBMC cytokine profile upon stimulation with *C. albicans* cells grown on glucose or lactate. Green boxes represent strains that behave similarly to the RM1000 strain and show increased production of (A) IL-10 and decreased levels of (B) IL-17 upon growth on lactate, while black boxes mark strains showing no significant difference between cells grown on glucose or lactate, based on  $P < 0.05$ . None of the strains tested displayed opposite phenotypes.
