# Supplementary material
Source: PubMed Central journal article supplement (PMC3536122)
Supplement: IAI.01092-12_zii999099958so2.pdf [file IAI.01092-12_zii999099958so2.pdf]

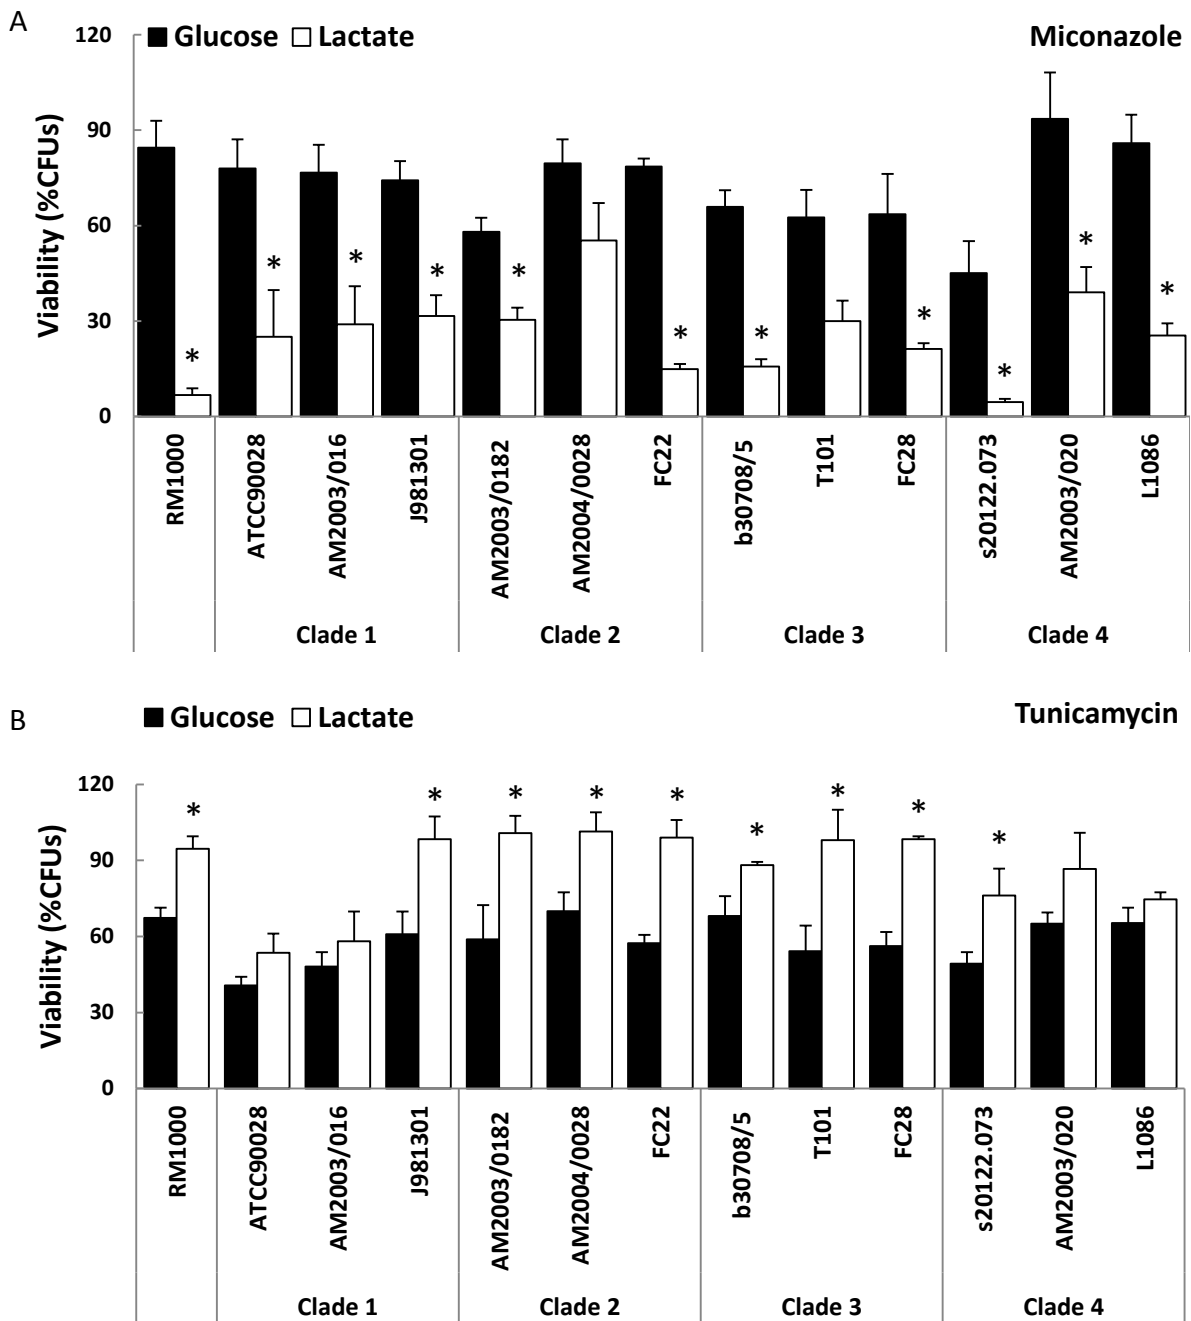

**FIG S2** Impact of carbon source on antifungal sensitivity among *C. albicans* clades. Sensitivity of *C. albicans* clinical isolates from the four major clades to the antifungal drugs (A) miconazole (25  $\mu\text{g/ml}$ ) and (B) tunicamycin (4  $\mu\text{g/ml}$ ). Strains from each clade have been isolated from different host niches (Table S3). Means  $\pm$  S.E.M. for at least three independent experiments are presented. Relative to glucose-grown cells: \*,  $P < 0.05$ .
