# Supplementary material
Source: PubMed Central journal article supplement (PMC3536122)
Supplement: IAI.01092-12_zii999099958so3.pdf [file IAI.01092-12_zii999099958so3.pdf]

| <b>One way ANOVA</b>      | <b>Clades 1-4 - IL-10 (<i>P</i> value)</b> |                       |
|---------------------------|--------------------------------------------|-----------------------|
| between carbon sources    | <b>&lt;0.001</b>                           |                       |
|                           | <b>Glucose</b>                             | <b>Lactate</b>        |
| between clades            | 0.177                                      | 0.113                 |
| between strains (clade 1) | 0.535                                      | 0.146                 |
| between strains (clade 2) | 0.055                                      | 0.303                 |
| between strains (clade 3) | 0.377                                      | 0.791                 |
| between strains (clade 4) | <b>0.016</b>                               | 0.330                 |
| between strains (1-12)    | <b>0.015</b>                               | 0.126                 |
| between donors (1-6)      | <b>&lt;0.001</b>                           | <b>&lt;0.001</b>      |
| CV average (range)        | 0.432 (0.248 - 0.682)                      | 0.241 (0.139 - 0.338) |
| <b>One way ANOVA</b>      | <b>Clades 1-4 - IL-17 (<i>P</i> value)</b> |                       |
| between carbon sources    | <b>&lt;0.001</b>                           |                       |
|                           | <b>Glucose</b>                             | <b>Lactate</b>        |
| between clades            | 0.887                                      | 0.302                 |
| between strains (clade 1) | 0.453                                      | 0.432                 |
| between strains (clade 2) | 0.745                                      | 0.805                 |
| between strains (clade 3) | 0.927                                      | 0.888                 |
| between strains (clade 4) | 0.984                                      | 0.975                 |
| between strains (1-12)    | 0.979                                      | 0.816                 |
| between donors (1-6)      | <b>&lt;0.001</b>                           | <b>&lt;0.001</b>      |
| CV average (range)        | 0.532 (0.426 - 0.695)                      | 0.467 (0.144 - 0.61)  |

**TABLE S1** Statistical analysis of the differences between carbon sources, clades, clinical isolates and donors with respect to cytokine production. This analysis is based on the data presented in Figure 4 (12 isolates from 4 clades). Dunnett's tests and one way ANOVAs were performed using IBM SPSS Statistics 20 for each carbon source (glucose or lactate),  $P < 0.05$ . Numbers in bold denote significant differences. CV average, the average of the coefficients of variation between the six donors for each isolate tested.
