# Supplementary material
Source: PubMed Central journal article supplement (PMC3536122)
Supplement: IAI.01092-12_zii999099958so4.pdf [file IAI.01092-12_zii999099958so4.pdf]

| <b>One way ANOVA</b>   | <b>Clade 2 - IL-10 (<i>P</i> value)</b> |                       |
|------------------------|-----------------------------------------|-----------------------|
| between carbon sources | <b>&lt;0.001</b>                        |                       |
|                        | <b>Glucose</b>                          | <b>Lactate</b>        |
| between strains (1-12) | <b>0.001</b>                            | 0.075                 |
| between donors (1-6)   | <b>&lt;0.001</b>                        | <b>&lt;.001</b>       |
| CV average (range)     | 0.456 (0.296 - 0.682)                   | 0.287 (0.182 - 0.377) |
| <b>One way ANOVA</b>   | <b>Clade 2- IL-17 (<i>P</i> value)</b>  |                       |
| between carbon sources | <b>0.061</b>                            |                       |
|                        | <b>Glucose</b>                          | <b>Lactate</b>        |
| between strains (1-12) | 0.883                                   | 0.141                 |
| between donors (1-6)   | <b>&lt;0.001</b>                        | <b>&lt;0.001</b>      |
| CV average (range)     | 0.547 (0.361 - 0.695)                   | 0.509 (0.308 - 0.661) |

**TABLE S2** Statistical analysis of the differences between carbon sources, clinical isolates and donors with respect to cytokine production. This analysis is based on the data presented in Figure 5 (12 isolates from clade 2). Dunnett's tests and one way ANOVAs were performed using IBM SPSS Statistics 20 for each carbon source (glucose or lactate),  $P < 0.05$ . Numbers in bold denote significant differences. CV average, the average of the coefficients of variation between the six donors for each isolate tested.
