# Supplementary material
Source: PubMed Central journal article supplement (PMC3536122)
Supplement: IAI.01092-12_zii999099958so5.pdf [file IAI.01092-12_zii999099958so5.pdf]

| Strain         | Clade | Genotype or site of infection                                                                                      | Source          |
|----------------|-------|--------------------------------------------------------------------------------------------------------------------|-----------------|
| SC5314         | 1     | Clinical isolate from blood                                                                                        | (3)             |
| CAI4           | 1     | <i>ura3Δ::λimm434/ura3Δ::λimm434</i>                                                                               | (2)             |
| CAI4 + Clp10   | 1     | <i>ura3Δ::λimm434/ura3Δ::λimm434 RPS1: Clp10 (URA3)</i>                                                            | Gwyneth Bertram |
| RM1000         | 1     | <i>ura3Δ::λimm434/ura3Δ::λimm434, his1::hisG/his1::hisG</i>                                                        | (5)             |
| RM1000 + Clp20 | 1     | <i>ura3Δ::λimm434/ura3Δ::λimm434, his1::hisG/his1::hisG, RSP1::Clp20 (URA3, HIS1)</i>                              | (6)             |
| BWP17          | 1     | <i>ura3Δ::λimm434/ura3Δ::λimm434, his1::hisG/his1::hisG, arg4::hisG/arg4::hisG</i>                                 | (8)             |
| BWP17 + Clp30  | 1     | <i>ura3Δ::λimm434/ura3Δ::λimm434, his1::hisG/his1::hisG, arg4::hisG/arg4::hisG, RPS1::Clp30 (URA3, HIS1, ARG4)</i> | (1)             |
| ATCC90028      | 1     | Clinical isolate from blood                                                                                        | Donna MacCallum |
| AM2003-016     | 1     | Clinical isolate from the oropharynx                                                                               | (4)             |
| J981301        | 1     | Clinical isolate from the vagina                                                                                   | Donna MacCallum |
| AM2003/0182    | 2     | Clinical isolate from blood                                                                                        | (4)             |
| AM2004/0028    | 2     | Clinical isolate from the oropharynx                                                                               | (4)             |
| FC22           | 2     | Clinical isolate from the vagina                                                                                   | (4)             |
| AM2003/0089    | 2     | Clinical isolate from blood                                                                                        | (4)             |
| IHEM16972      | 2     | Clinical isolate from the oropharynx                                                                               | (4)             |
| IHEM16614      | 2     | Clinical isolate from the oropharynx                                                                               | (4)             |
| AM2003/0100    | 2     | Clinical isolate from blood                                                                                        | (4)             |
| HEM16945       | 2     | Clinical isolate from the oropharynx                                                                               | (4)             |
| AM2003/0191    | 2     | Clinical isolate from blood                                                                                        | (4)             |
| AM2003/0069    | 2     | Clinical isolate from the vagina                                                                                   | (4)             |
| FC17           | 2     | Clinical isolate from the vagina                                                                                   | Donna MacCallum |
| FC13           | 2     | Clinical isolate from semen                                                                                        | Donna MacCallum |
| b30708/5       | 3     | Clinical isolate from blood                                                                                        | (4)             |
| T101           | 3     | Clinical isolate from the oropharynx                                                                               | (4)             |
| FC28           | 3     | Clinical isolate from the vagina                                                                                   | (4)             |
| s20122.073     | 4     | Clinical isolate from blood                                                                                        | (4)             |
| AM2003-020     | 4     | Clinical isolate from the oropharynx                                                                               | (4)             |
| L1086          | 4     | Clinical isolate from wound                                                                                        | (4)             |

**TABLE S3** List of *C. albicans* strains and clinical isolates used in this study.
