# Supplementary material
Source: PubMed Central journal article supplement (PMC3536122)
Supplement: IAI.01092-12_zii999099958so6.pdf [file IAI.01092-12_zii999099958so6.pdf]

## References

1. **Davis, D., J. E. Edwards Jr, A. P. Mitchell, and A. S. Ibrahim.** 2000. *Candida albicans* RIM101 pH response pathway is required for host-pathogen interactions. *Infect. Immun.* **68**:5953-5959.
2. **Fonzi, W. A., and M. Y. Irwin.** 1993. Isogenic strain construction and gene mapping in *Candida albicans*. *Genetics.* **134**:717-728.
3. **Gillum, A. M., E. Y. Tsay, and D. R. Kirsch.** 1984. Isolation of the *Candida albicans* gene for orotidine-5'-phosphate decarboxylase by complementation of *S. cerevisiae* *ura3* and *E. coli* *pyrF* mutations. *Mol. Gen. Genet.* **198**:179-182.
4. **MacCallum, D. M., L. Castillo, K. Nather, C. A. Munro, A. J. Brown, N. A. Gow, and F. C. Odds.** 2009. Property differences among the four major *Candida albicans* strain clades. *Eukaryot. Cell.* **8**:373-387.
5. **Negredo, A., L. Monteoliva, C. Gil, J. Pla, and C. Nombela.** 1997. Cloning, analysis and one-step disruption of the ARG5,6 gene of *Candida albicans*. *Microbiology.* **143**:297-302.
6. **Smith, D. A., S. Nicholls, B. A. Morgan, A. J. Brown, and J. Quinn.** 2004. A conserved stress-activated protein kinase regulates a core stress response in the human pathogen *Candida albicans*. *Mol. Biol. Cell.* **15**:4179-4190.
7. **Tavanti, A., A. D. Davidson, M. J. Fordyce, N. A. Gow, M. C. Maiden, and F. C. Odds.** 2005. "Population structure and properties of *Candida albicans*, as determined by multilocus sequence typing", *J Clin Microbiol.* **43**: 5601-5613.
8. **Wilson, R. B., D. Davis, and A. P. Mitchell.** 1999. Rapid hypothesis testing with *Candida albicans* through gene disruption with short homology regions. *J. Bacteriol.* **181**:1868-1874.
